# Supplementary material for: Hydraulic fracturing and infant health: New evidence from Pennsylvania
Source: PubMed Central journal article supplement — Sci Adv. 2017 Dec 13;3(12):e1603021. doi: 10.1126/sciadv.1603021 (PMC5729015; doi:10.1126/sciadv.1603021), 2017-12-13
Supplement: 1603021_SM.pdf [file 1603021_SM.pdf]

## Supplementary Materials for **Hydraulic fracturing and infant health: New evidence from Pennsylvania**

Janet Currie, Michael Greenstone, Katherine Meckel

Published 13 December 2017, *Sci. Adv.* **3**, e1603021 (2017)

DOI: 10.1126/sciadv.1603021

### **This PDF file includes:**

- table S1. Comparison of mothers by number of births observed in sample.
- table S2. Effect of fracturing on infant health (including both inactive and active wells).
- table S3. Effect of fracturing on infant health (treatment based on birth date).
- table S4. Effect of fracturing on infant health (controlling for latitude/longitude grid\*year controls).
- table S5. Mothers with <2 well sites spudded within 1 km versus mothers with 2+ well sites spudded within 1 km.
- table S6. Effect of fracturing on infant health (logit for low birth weight).

Table S1: Compare Mothers by Number of Births Observed in Sample

|                               | One Birth<br>(1) | 2+ Births<br>(2) |
|-------------------------------|------------------|------------------|
| <i>Mother Characteristics</i> |                  |                  |
| Married                       | 0.57             | 0.62             |
| Black                         | 0.16             | 0.16             |
| Hispanic                      | 0.10             | 0.09             |
| < High School                 | 0.13             | 0.16             |
| High School                   | 0.27             | 0.26             |
| Some College                  | 0.29             | 0.25             |
| College                       | 0.20             | 0.21             |
| Advanced                      | 0.11             | 0.12             |
| Less than 20                  | 0.07             | 0.06             |
| 20-24                         | 0.21             | 0.22             |
| 25-29                         | 0.25             | 0.30             |
| 30-34                         | 0.26             | 0.28             |
| Over 35                       | 0.20             | 0.14             |
| <i>Infant Characteristics</i> |                  |                  |
| 1st born                      | 0.53             | 0.31             |
| 2nd born                      | 0.27             | 0.38             |
| 3rd born                      | 0.13             | 0.18             |
| 4th and up                    | 0.07             | 0.13             |
| N                             | 545,526          | 580,223          |

The data source is the universe of birth certificates in PA, 2004-2013, matched to the PA DEP Internal Operator Well Inventory, which is described in the notes to Figure 1. Each observation is a birth. Maternal demographics are recorded at the time of birth. Given the large sample sizes all of the means for one birth are statistically significantly different than the means for 2+ births.

Table S2: Effect of Fracturing on Infant Health, Including Both Inactive and Active Wells

| <i>Dependent Variable</i>          | (Near = 0-1 km) x After |                     |                   | (Near = 1-2 km) x After |                   |                   | (Near = 2-3 km) x After |                      |                   |
|------------------------------------|-------------------------|---------------------|-------------------|-------------------------|-------------------|-------------------|-------------------------|----------------------|-------------------|
|                                    | (1)                     | (2)                 | (3)               | (4)                     | (5)               | (6)               | (7)                     | (8)                  | (9)               |
| Low Birth Weight<br>(mean = 0.065) | 0.014**<br>(0.006)      | 0.013**<br>(0.006)  | 0.010<br>(0.014)  | 0.005<br>(0.003)        | 0.004<br>(0.003)  | 0.003<br>(0.007)  | 0.008***<br>(0.003)     | 0.007***<br>(0.003)  | 0.008<br>(0.005)  |
| Birth Weight<br>(mean = 3319.6)    | -33.5**<br>(14.5)       | -32.9**<br>(14.6)   | -11.5<br>(28.8)   | -3.8<br>(8.1)           | -2.0<br>(8.1)     | -7.0<br>(13.6)    | -9.9<br>(6.2)           | -8.5<br>(6.3)        | -0.5<br>(10.2)    |
| Health Index<br>(mean = 0.000)     | -0.043**<br>(0.017)     | -0.041**<br>(0.018) | -0.003<br>(0.038) | -0.019+<br>(0.010)      | -0.015<br>(0.010) | -0.013<br>(0.019) | -0.027***<br>(0.007)    | -0.024***<br>(0.008) | -0.017<br>(0.014) |
| N                                  | 1,083,485               | 228,268             | 228,268           | 1,100,357               | 245,113           | 245,113           | 1,116,988               | 261,688              | 261,688           |
| Mother FE                          | No                      | No                  | Yes               | No                      | No                | Yes               | No                      | No                   | Yes               |
| Under 15 km                        | No                      | Yes                 | Yes               | No                      | Yes               | Yes               | No                      | Yes                  | Yes               |

In this Table, we re-estimate the coefficients shown in Table 2, adding to our sample wells that are inactive (plugged) as of the date on which we downloaded the well spud data (November 2014).

Table S3: Effect of Fracturing on Infant Health, Treatment based on Birth Date

| <i>Dependent Variable</i>          | (Near = 0-1 km) x After |                      |                  | (Near = 1-2 km) x After |                   |                   | (Near = 2-3 km) x After |                      |                   |
|------------------------------------|-------------------------|----------------------|------------------|-------------------------|-------------------|-------------------|-------------------------|----------------------|-------------------|
|                                    | (1)                     | (2)                  | (3)              | (4)                     | (5)               | (6)               | (7)                     | (8)                  | (9)               |
| Low Birth Weight<br>(mean = 0.065) | 0.015**<br>(0.006)      | 0.014**<br>(0.006)   | 0.010<br>(0.013) | 0.002<br>(0.003)        | 0.002<br>(0.003)  | -0.001<br>(0.006) | 0.007**<br>(0.003)      | 0.006**<br>(0.003)   | 0.005<br>(0.005)  |
| Birth Weight<br>(mean = 3319.6)    | -27.0+<br>(14.7)        | -25.412+<br>(14.714) | 5.7<br>(28.4)    | -3.8<br>(7.9)           | -1.844<br>(7.991) | -12.0<br>(13.5)   | -6.1<br>(6.1)           | -4.353<br>(6.189)    | -1.7<br>(9.9)     |
| Health Index<br>(mean = 0.000)     | -0.042**<br>(0.017)     | -0.040**<br>(0.018)  | 0.025<br>(0.037) | -0.015<br>(0.009)       | -0.012<br>(0.010) | -0.011<br>(0.018) | -0.023***<br>(0.007)    | -0.020***<br>(0.008) | -0.013<br>(0.014) |
| N                                  | 1,086,917               | 231,578              | 231,578          | 1,102,424               | 247,085           | 247,085           | 1,117,919               | 262,580              | 262,580           |
| Mother FE                          | No                      | No                   | Yes              | No                      | No                | Yes               | No                      | No                   | Yes               |
| Under 15 km                        | No                      | Yes                  | Yes              | No                      | Yes               | Yes               | No                      | Yes                  | Yes               |

In this Table, we re-estimate the coefficients shown in Table 2, re-defining exposure to mean the birth date, rather than the conception date, is after the well spud date.

Table S4: Effect of Fracturing on Infant Health, Controlling for Lat./Long. Grid\*Year Controls

| <i>Dependent Variabi</i>           | (Near = 0-1 km) x After |                       |                     | (Near = 1-2 km) x After |                   |                    | (Near = 2-3 km) x After |                     |                    |
|------------------------------------|-------------------------|-----------------------|---------------------|-------------------------|-------------------|--------------------|-------------------------|---------------------|--------------------|
|                                    | (1)                     | (2)                   | (3)                 | (4)                     | (5)               | (6)                | (7)                     | (8)                 | (9)                |
| Low Birth Weight<br>(mean = 0.065) | 0.014+<br>(0.007)       | 0.013+<br>(0.007)     | 0.015<br>(0.015)    | 0.004<br>(0.004)        | 0.004<br>(0.004)  | 0.005<br>(0.007)   | 0.007**<br>(0.003)      | 0.007**<br>(0.003)  | 0.006<br>(0.006)   |
| Birth Weight<br>(mean = 3319.6)    | -40.902**<br>(16.171)   | -39.466**<br>(16.188) | -12.025<br>(31.967) | -7.493<br>(9.062)       | -6.434<br>(9.102) | -8.367<br>(15.628) | -8.418<br>(7.017)       | -7.232<br>(7.042)   | 10.583<br>(11.273) |
| Health Index<br>(mean = 0.000)     | -0.043**<br>(0.019)     | -0.044**<br>(0.020)   | -0.010<br>(0.042)   | -0.012<br>(0.011)       | -0.012<br>(0.011) | -0.014<br>(0.021)  | -0.020**<br>(0.008)     | -0.020**<br>(0.009) | -0.007<br>(0.015)  |
| N                                  | 1,086,917               | 231,578               | 231,578             | 1,102,424               | 247,085           | 247,085            | 1,117,919               | 262,580             | 262,580            |
| Mother FE                          | No                      | No                    | Yes                 | No                      | No                | Yes                | No                      | No                  | Yes                |
| Under 15 km                        | No                      | Yes                   | Yes                 | No                      | Yes               | Yes                | No                      | Yes                 | Yes                |

In this Table, we re-estimate the coefficients shown in Table 2, replacing the county and Region\*Year fixed effect controls with 0.5 by 0.5 latitude/longitude square and square\*year fixed effect controls. To create these new controls, we first assign each birth a code corresponding to the 0.5 wide bin its latitude belongs to and the 0.5 bin its longitude belongs to. Births with missing latitude or longitude are included and given separate codes for either case. We then replace the county fixed effects in our main specification with fixed effects for these latitude/longitude squares and we replace region\*year FE with square\*year FE. There are 77 lat/lon square fixed effects and 637 year\*square interaction fixed effects (note that an interaction may not exist if there are no births within that year and square).

Table S5: Mothers with <2 well sites spudded within 1km vs. mothers with 2+ well sites spudded within 1km.

| <i>Dependent Variable:</i>                        | LBW                |                      |                   | BW                     |                       |                      | Health Index         |                      |                   |
|---------------------------------------------------|--------------------|----------------------|-------------------|------------------------|-----------------------|----------------------|----------------------|----------------------|-------------------|
|                                                   | (1)                | (2)                  | (3)               | (4)                    | (5)                   | (6)                  | (7)                  | (8)                  | (9)               |
| Conceived after at least 1 well<br>spudded in 1km | 0.021**<br>(0.008) | 0.027***<br>(0.010)  | 0.009<br>(0.023)  | -49.777***<br>(18.462) | -56.334**<br>(23.439) | 5.921<br>(52.735)    | -0.068***<br>(0.023) | -0.079***<br>(0.029) | 0.055<br>(0.071)  |
| Conceived after >2 wells<br>spudded in 1km        | -0.015<br>(0.013)  | 0.016<br>(0.026)     | 0.013<br>(0.053)  | 36.749<br>(31.588)     | 24.382<br>(61.795)    | -66.848<br>(120.111) | 0.043<br>(0.036)     | -0.023<br>(0.070)    | -0.130<br>(0.123) |
| 1 or 2 well sites in 1 km                         | -0.006<br>(0.005)  | -0.014***<br>(0.005) | -0.026<br>(0.022) | 16.690<br>(11.804)     | 33.807**<br>(13.779)  | -40.427<br>(44.838)  | 0.015<br>(0.013)     | 0.045***<br>(0.015)  | -0.003<br>(0.060) |
| >2 well sites in 1 km                             | 0.006<br>(0.006)   | -0.001<br>(0.010)    | 0.053+<br>(0.031) | -4.843<br>(15.522)     | 14.534<br>(24.310)    | 45.718<br>(84.293)   | -0.013<br>(0.018)    | 0.005<br>(0.028)     | -0.035<br>(0.102) |
| N                                                 | 1086917            | 146,266              | 146,266           | 1086917                | 146,266               | 146,266              | 1086917              | 146,266              | 146,266           |
| Mother FE                                         | No                 | No                   | Yes               | No                     | No                    | Yes                  | No                   | No                   | Yes               |
| Under 15 km                                       | No                 | Yes                  | Yes               | No                     | Yes                   | Yes                  | No                   | Yes                  | Yes               |

Notes: This table shows estimates for mothers who live <1km from a well site vs. mothers who live >3 and <15 km from a well site. Mothers may have 0, 1-2, or >2 wells spudded within 1km, so the omitted category is 0 wells spudded (no fracting).

Table S6: Effect of Fracturing on Infant Health, Logits for Low Birth Weight

|                                    | (Near = 0-1 km) x After<br>(1) | (Near = 1-2 km) x After<br>(2) | (Near = 2-3 km) x After<br>(3) |
|------------------------------------|--------------------------------|--------------------------------|--------------------------------|
| Low Birth Weight<br>(mean = 0.065) | 0.283**<br>(0.121)             | 0.088<br>(0.070)               | 0.145**<br>(0.052)             |
| Marginal Effect                    | 0.016                          | 0.005                          | 0.008                          |
| N                                  | 231,578                        | 247,085                        | 262,580                        |
| Mother FE                          | No                             | No                             | No                             |
| Under 15 km                        | Yes                            | Yes                            | Yes                            |
